# Supplementary material for: Timing is everything: priority effects alter community invasibility after disturbance
Source: PubMed Central journal article supplement (PMC3936386; doi:10.1002/ece3.940), 2014-01-20
Supplement: ece30004-0397-sd1.pdf [file ece30004-0397-sd1.pdf]

**Table S1.** Treatment mean and standard deviations (sd) at the beginning and end of the experiment for control (C), +nutrient (N), +salt (S) and +salt+nutrient (SN) treatments. The three different dispersal-delay treatments are denoted as short, med and long for the 5, 14 and 23 delay between disturbance and dispersal respectively.

|                          | C-short |      | C-med |       | C-long |       | N-short |       | N-med |       | N-long |       |
|--------------------------|---------|------|-------|-------|--------|-------|---------|-------|-------|-------|--------|-------|
|                          | mean    | sd   | mean  | sd    | mean   | sd    | mean    | sd    | mean  | sd    | mean   | sd    |
| Initial Diversity        | 0.69    | 0.13 | 1.35  | 0.35  | 1.40   | 0.41  | 0.92    | 0.09  | 1.03  | 0.34  | 0.83   | 0.13  |
| Initial Evenness         | 0.71    | 0.16 | 0.65  | 0.30  | 0.61   | 0.45  | 0.74    | 0.22  | 0.84  | 0.12  | 0.71   | 0.28  |
| Initial Species Richness | 1.75    | 0.96 | 3.00  | 0.82  | 3.25   | 0.96  | 2.50    | 1.00  | 3.75  | 0.96  | 2.25   | 1.26  |
| Initial Abundance        | 1.3     | 0.19 | 3.00  | 1.85  | 11.42  | 12.72 | 0.94    | 0.23  | 1.64  | 0.99  | 8.83   | 12.42 |
| Initial Chl- <i>a</i>    | 4.38    | 2.29 | 8.20  | 10.47 | 3.00   | 0.75  | 11.12   | 5.01  | 26.6  | 5.10  | 15.78  | 6.54  |
| Final Diversity          | 1.32    | 0.33 | 1.50  | 0.21  | 1.20   | 0.21  | 1.50    | 0.15  | 1.01  | 0.24  | 1.10   | 0.20  |
| Final Evenness           | 0.73    | 0.23 | 0.81  | 0.16  | 0.76   | 0.24  | 0.36    | 0.11  | 0.35  | 0.30  | 0.24   | 0.19  |
| Final Species Richness   | 3.00    | 0.82 | 4.00  | 1.15  | 2.50   | 1.29  | 5.25    | 0.96  | 3.25  | 0.96  | 2.25   | 0.50  |
| Final Abundance          | 4.08    | 1.18 | 9.58  | 4.86  | 3.78   | 1.85  | 45.50   | 27.88 | 94.39 | 80.66 | 97.17  | 74.83 |
| Final Chl- <i>a</i>      | 2.63    | 1.14 | 2.68  | 0.56  | 3.63   | 1.35  | 4.50    | 2.50  | 3.28  | 1.28  | 3.33   | 0.91  |

  

|                          | S-short |      | S-med |      | S-long |      | SN-short |       | SN-med |       | SN-long |       |
|--------------------------|---------|------|-------|------|--------|------|----------|-------|--------|-------|---------|-------|
|                          | mean    | sd   | mean  | sd   | mean   | sd   | mean     | sd    | mean   | sd    | mean    | sd    |
| Initial Diversity        | 0.73    | 0.49 | 1.25  | 0.39 | 1.12   | 0.46 | 0.90     | 0.11  | 1.39   | 0.29  | 1.25    | 0.31  |
| Initial Evenness         | 0.84    | 0.16 | 0.65  | 0.16 | 0.62   | 0.28 | 0.89     | 0.13  | 0.86   | 0.09  | 0.72    | 0.16  |
| Initial Species Richness | 2.00    | 1.15 | 3.25  | 1.26 | 2.75   | 0.50 | 1.75     | 0.50  | 2.50   | 1.29  | 3.75    | 0.96  |
| Initial Abundance        | 1.58    | 1.32 | 1.39  | 0.46 | 8.75   | 7.20 | 0.53     | 0.42  | 1.92   | 0.88  | 4.59    | 2.87  |
| Initial Chl- <i>a</i>    | 1.95    | 0.93 | 4.85  | 0.92 | 3.10   | 0.74 | 10.85    | 3.09  | 36.55  | 14.28 | 25.10   | 3.01  |
| Final Diversity          | 1.43    | 0.13 | 1.91  | 0.26 | 1.00   | 0.24 | 1.49     | 0.33  | 1.33   | 0.31  | 1.40    | 0.11  |
| Final Evenness           | 0.62    | 0.15 | 0.57  | 0.21 | 0.64   | 0.38 | 0.30     | 0.13  | 0.37   | 0.26  | 0.57    | 0.27  |
| Final Species Richness   | 4.50    | 0.58 | 5.50  | 0.58 | 2.75   | 1.71 | 3.75     | 2.06  | 3.75   | 1.26  | 3.50    | 1.91  |
| Final Abundance          | 11.11   | 1.79 | 6.31  | 1.08 | 8.86   | 5.61 | 37.14    | 37.03 | 50.28  | 25.59 | 38.28   | 38.43 |
| Final Chl- <i>a</i>      | 7.05    | 4.27 | 3.55  | 1.36 | 2.83   | 0.40 | 10.90    | 7.74  | 7.03   | 2.97  | 4.70    | 2.60  |
