# Supplementary material for: Timing is everything: priority effects alter community invasibility after disturbance
Source: PubMed Central journal article supplement (PMC3936386; doi:10.1002/ece3.940), 2014-01-20
Supplement: ece30004-0397-sd2.pdf [file ece30004-0397-sd2.pdf]

**Table S2.** Benjamini-Hochberg false discovery rate corrected  $p$ -values for ANOVA linear contrasts between the control (C), +nutrient (N), +salt (S) and +salt+nutrient (SN) treatments. The three different dispersal-delay treatments are denoted as short, med and long for the 5, 14 and 23 delay between disturbance and dispersal respectively. Comparisons were made between the three dispersal-delay treatments for resident community initial and average Shannon-Weiner diversity, evenness ( $E_{var}$ ), species richness and total zooplankton abundance

| Treatments compared      | C-short<br>C-med | C-short<br>C-long | C-med<br>C-long | N-short<br>N-med | N-short<br>N-long | N-med<br>N-long |
|--------------------------|------------------|-------------------|-----------------|------------------|-------------------|-----------------|
| Initial Diversity        | 0.29             | 0.29              | 0.99            | 0.71             | 0.80              | 0.35            |
| Initial Evenness         | 0.89             | 0.20              | 0.51            | 0.03             | 0.03              | 0.13            |
| Initial Species richness | 0.10             | 0.56              | 0.56            | 0.17             | 0.41              | 0.63            |
| Initial Abundance        | 0.85             | 0.23              | 0.59            | 0.001            | <0.001            | <0.001          |
| Avg Diversity            | 0.87             | 0.87              | 0.88            | 0.87             | 0.87              | 0.87            |
| Avg Evenness             | 0.98             | 0.76              | 0.76            | 0.37             | 0.37              | 0.43            |
| Avg Species richness     | 0.79             | 0.79              | 0.79            | 0.79             | 0.79              | 0.79            |
| Avg Abundance            | 0.94             | 0.90              | 0.94            | 0.33             | 0.33              | 0.37            |

  

| Treatments compared      | S-short<br>S-med | S-short<br>S-long | S-med<br>S-long | SN-short<br>SN-med | SN-short<br>SN-long | SN-med<br>SN-long |
|--------------------------|------------------|-------------------|-----------------|--------------------|---------------------|-------------------|
| Initial Diversity        | 0.11             | 0.24              | 0.64            | 0.24               | 0.24                | 0.24              |
| Initial Evenness         | 0.89             | 0.86              | 0.89            | 0.58               | 0.86                | 0.92              |
| Initial Species richness | 0.02             | 0.17              | 0.63            | 0.02               | 0.12                | 0.36              |
| Initial Abundance        | 0.58             | 0.58              | 0.28            | 0.01               | 0.01                | 0.01              |
| Avg Diversity            | 0.87             | 0.87              | 0.87            | 0.88               | 0.87                | 0.87              |
| Avg Evenness             | 0.76             | 0.76              | 0.76            | 0.76               | 0.76                | 0.76              |
| Avg Species richness     | 0.79             | 0.79              | 0.94            | 0.79               | 0.79                | 0.79              |
| Avg Abundance            | 0.57             | 0.37              | 0.37            | 0.33               | 0.33                | 0.37              |
