# Supplementary material for: Timing is everything: priority effects alter community invasibility after disturbance
Source: PubMed Central journal article supplement (PMC3936386; doi:10.1002/ece3.940), 2014-01-20
Supplement: ece30004-0397-sd3.pdf [file ece30004-0397-sd3.pdf]

**Table S3.** Results of one-way ANOVAs for the dispersers added at each dispersal-delay treatment to determine if there were differences in the disperser pool throughout the season

| Response variable | df | Sum of Squares | Mean Squares | F   | <i>p</i> |
|-------------------|----|----------------|--------------|-----|----------|
| Diversity         | 2  | 0.02           | 0.01         | 0.8 | 0.47     |
| Residual          | 9  | 0.11           | 0.01         |     |          |
| Evenness          | 2  | 0.01           | 0.002        | 1.5 | 0.27     |
| Residual          | 9  | 0.01           | 0.002        |     |          |
| Species richness  | 2  | 10.2           | 5.1          | 3.6 | 0.07     |
| Residual          | 9  | 12.8           | 1.4          |     |          |
| CA1 scores        | 2  | 1.82           | 0.91         | 4.1 | 0.05     |
| Residual          | 9  | 2.01           | 0.22         |     |          |
| CA2 scores        | 2  | 0.01           | 0.003        | 0.1 | 0.94     |
| Residual          | 9  | 0.38           | 0.042        |     |          |
| Abundance         | 2  | 0.23           | 0.12         | 8.0 | 0.01     |
| Residual          | 9  | 0.13           | 0.01         |     |          |
