# Supplementary material for: Timing is everything: priority effects alter community invasibility after disturbance
Source: PubMed Central journal article supplement (PMC3936386; doi:10.1002/ece3.940), 2014-01-20
Supplement: ece30004-0397-sd5.pdf [file ece30004-0397-sd5.pdf]

**Table S5.** Species added at each time step. The presence of a species at each time dispersers were added is denoted Y if it was present in an enclosure at the end of the experiment and N if it was in the disperser pool but failed to establish.

| Species                         | Functional group  | Reproduction         | Dispersal delay |        |      |
|---------------------------------|-------------------|----------------------|-----------------|--------|------|
|                                 |                   |                      | Short           | Medium | Long |
| <i>Ceriodaphnia laticaudata</i> | Cladoceran        | Cyclic parthenogen   | Y               | Y      | -    |
| <i>Daphnia middendorffiana</i>  | Cladoceran        | Obligate parthenogen | Y               | Y      | Y    |
| <i>Daphnia pulex</i>            | Cladoceran        | Obligate parthenogen | Y               | N      | N    |
| <i>Daphnia pulicaria</i>        | Cladoceran        | Cyclic parthenogen   | N               | Y      | N    |
| <i>Diacyclops thomasi</i>       | Cyclopoid copepod | Sexual               | Y               | Y      | Y    |
| <i>Polyphemus pediculus</i>     | Cladoceran        | Cyclic parthenogen   | N               | N      | Y    |
| <i>Scapholeberis kingii</i>     | Cladoceran        | Cyclic parthenogen   | N               | N      | Y    |
| <i>Diacyclops arcticus</i>      | Calanoid copepod  | Sexual               | N               | N      | N    |
| <i>Diaphanosoma brachyurum</i>  | Cladoceran        | Cyclic parthenogen   | -               | N      | N    |
| <i>Epischura lacustris</i>      | Calanoid copepod  | Sexual               | N               | -      | N    |
| <i>Eurytemora affinis</i>       | Calanoid copepod  | Sexual               | N               | N      | -    |
| <i>Microcyclops rubellus</i>    | Cyclopoid copepod | Sexual               | N               | N      | -    |
| <i>Sida crystallina</i>         | Cladoceran        | Cyclic parthenogen   | -               | -      | N    |
