# Supplementary material for: Timing is everything: priority effects alter community invasibility after disturbance
Source: Ecol Evol. 2014 Jan 20;4(4):397–407. doi: 10.1002/ece3.940 (PMC3936386; doi:10.1002/ece3.940)
Supplement: Table S4 — Benjamini–Hochberg false discovery rate corrected P-values for ANOVA linear contrasts between the control (C), +nutrient (N), +salt (S), and +salt+nutrient (SN) treatments. [file ece30004-0397-sd4.pdf]

**Table S4.** Benjamini-Hochberg false discovery rate corrected  $p$ -values for ANOVA linear contrasts between the control (C), +nutrient (N), +salt (S) and +salt+nutrient (SN) treatments. The three different dispersal-delay treatments are denoted as short, med and long for the 5, 14 and 23 delay between disturbance and dispersal respectively. Comparisons were made between the three dispersal-delay treatments for initial and average Chl- $a$  concentration ( $\mu\text{g L}^{-1}$ ), temperature (C) and conductivity ( $\mu\text{S cm}^{-1}$ )

| Treatments compared  | C-short<br>C-med | C-short<br>C-long | C-med<br>C-long | N-short<br>N-med | N-short<br>N-long | N-med<br>N-long |
|----------------------|------------------|-------------------|-----------------|------------------|-------------------|-----------------|
| Initial Chl- $a$     | 0.98             | 0.98              | 0.98            | 0.08             | 0.09              | 0.42            |
| Initial Temperature  | <0.001           | <0.001            | <0.001          | <0.001           | <0.001            | <0.001          |
| Initial Conductivity | 0.99             | 0.99              | 0.99            | 0.99             | 0.99              | 0.99            |
| Ave Chl- $a$         | 0.99             | 0.99              | 0.99            | 0.99             | 0.99              | 0.99            |
| Ave Temperature      | 0.09             | 0.13              | 0.09            | 0.50             | 0.75              | 0.16            |
| Ave Conductivity     | 0.99             | 0.99              | 0.99            | 0.99             | 0.99              | 0.99            |

  

| Treatments compared  | S-short<br>S-med | S-short<br>S-long | S-med<br>S-long | SN-short<br>SN-med | SN-short<br>SN-long | SN-med<br>SN-long |
|----------------------|------------------|-------------------|-----------------|--------------------|---------------------|-------------------|
| Initial Chl- $a$     | 0.98             | 0.98              | 0.98            | 0.32               | 0.32                | 0.60              |
| Initial Temperature  | <0.001           | <0.001            | <0.001          | <0.001             | <0.001              | <0.001            |
| Initial Conductivity | 0.99             | 0.99              | 0.99            | 0.99               | 0.99                | 0.99              |
| Ave Chl- $a$         | 0.99             | 0.99              | 0.99            | 0.99               | 0.99                | 0.99              |
| Ave Temperature      | 0.69             | 0.55              | 0.09            | 0.16               | 0.55                | 0.99              |
| Ave Conductivity     | 0.99             | 0.99              | 0.99            | 0.99               | 0.99                | 0.99              |
